# Supplementary material for: Selenium-mediated gga-miR-29a-3p regulates LMH cell proliferation, invasion, and migration by targeting COL4A2
Source: Royal Society of Chemistry journal article supplement (doi:10.1039/c9mt00266a), 2020-02-10
Supplement: c9mt00266a1.pdf [file c9mt00266a1.pdf]

**Table 2 miRNAs and mRNAs primer sequences**

| <b>Genes</b> | <b>Forward primer (5'-3')</b> | <b>Reverse primer (5'-3')</b> |
|--------------|-------------------------------|-------------------------------|
| miR-29a-3p   | GCGGTAGCACCATTGAAATCGGTT      | General Reverse primer        |
| U6           | CACGCAAATTCGTGAAGCGTTCCA      | General Reverse primer        |
| KLF4         | CAGAGGAGACAAAGCCCAAG          | TCAGGTGTGCCTTGAGATGA          |
| CDK1         | CCACTTTTCCACGGGGACTCAG        | TCCCAGGCTGCCAGGTTTCC          |
| CDK2         | TCATCCCTGGGCGGCATCG           | GGCACCGTCGGCGTTGATG           |
| CDK6         | TGAGTGCCTGGCTGAGATCGG         | ATGCCCTCCTCGCTGGTCTG          |
| CCNB1        | CTGGGGAGGCGGATGCTGAG          | AGCGGCTGCGATCTCTGAAGG         |
| CCND1        | CTCGCCCTCGGTGTCCTACTTC        | TCCTCGCAGACCTCCAGCATC         |
| CCNE1        | GCGGCGGGAGAGCGACTG            | CCACATCGGCTTTCCTCTTGCG        |
| ELF2         | GGAATCCTTGCCAAAGTTGA          | AATCTTCACTGCAGGGTTTCG         |
| NFIA         | GGCAAAGCTTCGGAAAGATA          | TTCATCTTGCCCTTCTGGT           |
| CLK2         | GAGGTCATTCTGGAGCTTGG          | TGTGTCTGGAACAGGGTGAA          |
| IREB2        | GCCGTTACTCTCACTCTGC           | AGCGACTTCAGCTTGCCTAA          |
| BLMH         | GTGGTTTGGCTGTGATGTTG          | AAACGCTCTGCCTTGTTTAT          |
| PMP22        | GTGCTCCTCTTCGTCTCCAC          | GATGATGTCAGGCACTGGAA          |
| COL4A2       | ATCCAGGCGATACAGGTTCC          | TCACACCTGCTCGTCCACTT          |
| PTEN         | CTGACTGCTGGCTGTGGTT           | GATTTGTGCACGTGGAGCTG          |
| SRC          | GACCCCAACAAGACAGCAG           | CGACGTGACGGTGTGAGAAG          |
| RhoA         | AAAGCTGGTCATAGTGGGCG          | AGACGGTGGGAACGTAGACT          |
| ROCK1        | GCAAGCATGCAGGATTTGAGG         | CGCTTGCATCTCATTAAAGCTCC       |
| MLC1         | CGTGAAGTCTGCTGACCACCAT        | TAGCTCCGTGCTTCAGGATG          |
| Actnin       | TGAAGCCCAGAGCAAA              | TCTCCATATCATCCCAGTT           |
