# Supplementary material for: Selenium-mediated gga-miR-29a-3p regulates LMH cell proliferation, invasion, and migration by targeting COL4A2
Source: Royal Society of Chemistry journal article supplement (doi:10.1039/c9mt00266a), 2020-02-10
Supplement: c9mt00266a2.pdf [file c9mt00266a2.pdf]

**Table 3. The antibodies information used in the present study**

| Antibody name  | Dilution ratio | Manufacturers                              |
|----------------|----------------|--------------------------------------------|
| CDK1           | 1:400          | Boster Biological Technology, Wuhan, China |
| CDK2           | 1:400          | Boster Biological Technology, Wuhan, China |
| CDK6           | 1:400          | Boster Biological Technology, Wuhan, China |
| Cyclin B1      | 1:400          | Boster Biological Technology, Wuhan, China |
| Cyclin D1      | 1:400          | Boster Biological Technology, Wuhan, China |
| Cyclin E1      | 1:600          | Bimake Co., Ltd., Shanghai, China          |
| COL4A2         | 1:800          | Bioss Technology Co. Ltd., Beijing, China  |
| PTEN           | 1:600          | Bioss Technology Co. Ltd., Beijing, China  |
| SRC            | 1:600          | Wanleibio Co., Ltd., Shenyang, China       |
| RhoA           | 1:600          | Wanleibio Co., Ltd., Shenyang, China       |
| Rock1          | 1:600          | Wanleibio Co., Ltd., Shenyang, China       |
| MLC1           | 1:600          | Wanleibio Co., Ltd., Shenyang, China       |
| Actnin         | 1:600          | Wanleibio Co., Ltd., Shenyang, China       |
| $\beta$ -actin | 1:1000         | Bioss Technology Co. Ltd., Beijing, China  |
